# Supplementary material for: The effect of community-acquired bacteraemia on return to workforce, risk of sick leave, permanent disability pension and death: a Danish population-based cohort study
Source: HighWire-hosted journal article supplement (doi:10.1136/bmjopen-2013-004208), 2014-01-01

Supplement to:

**The effect of community-acquired bacteraemia on return to workforce, risk of sick leave, permanent disability pension and death: A Danish population-based cohort study**

Michael Dalager-Pedersen, Kristoffer Koch, Reimar Wernich Thomsen, Henrik Carl Schønheyder, Henrik Nielsen

**Supplement, Table 1.** DREAM codes (version 28) used in the study.

**Supplement, Table 2.** ICD and ATC codes used in the study.

**Supplement, Table 3.** Bacteremia patients' risk for sick leave, permanent disability pension, and mortality by focus of infection compared to blood culture negative controls.

**Supplement, Table 4.** Risk for sick leave, disability pension, and mortality by age, gender, and employment status.

**Supplement, Figure 1.** Flow chart of hospitalised medical study subjects with first-time blood cultures, North Denmark, 1996-2010.

**Supplement, Figure 2.** Cumulative mortality in workforce CAB patients, blood culture negative controls, and population controls, North Denmark, 1996-2011.

**Supplement, Table 1.** DREAM codes (version 28) used in the study.

| <b>DREAM category</b>        | <b>Subcategory</b> | <b>Transfer payment, examples</b>                                                        | <b>DREAM codes</b>                                                           |
|------------------------------|--------------------|------------------------------------------------------------------------------------------|------------------------------------------------------------------------------|
| Work-ready                   | Employed           | No transfer payment, leave, apprentice (adult), student support, maternity leave payment | No code if no transfer payment, 121-126, 412-413, 511-522, 611, 651-661, 881 |
|                              | Unemployed         | Unemployment benefit, vocational pre-rehabilitation and rehabilitation benefit           | 111-113, 130-138, 211-299, 730-738, 750,752-758, 760, 762-768                |
| Sick leave                   |                    | Sickness absence benefit                                                                 | 890, 892-899                                                                 |
| Permanent disability pension |                    | "Flex-job" payment                                                                       | 740-748, 771-774                                                             |
|                              |                    | Disability pension                                                                       | 781-783                                                                      |

During the study period, Danes who were  $\geq 60$  years of age could go on voluntary early retirement pension ("efterløn"), and those who were  $\geq 65$  years of age could go on public retirement pension. Since we studied subjects 20-58 years of age, retirement codes are not detailed here. All DREAM codes are detailed elsewhere

([http://www.dst.dk/da/TilSalg/Forskningservice/Data/Andre\\_Styrelser.aspx](http://www.dst.dk/da/TilSalg/Forskningservice/Data/Andre_Styrelser.aspx))

**Supplement, Table 2.** ICD and ATC codes used in the study

| <b>Comorbidities (previous)</b>  | <b>ICD codes</b>                                                                                                                         |
|----------------------------------|------------------------------------------------------------------------------------------------------------------------------------------|
| Myocardial infarction            | ICD-8: 410; ICD-10: I21-I23                                                                                                              |
| Cerebrovascular disease          | ICD-8: 430-438; ICD-10: I60-I69, G45, G46                                                                                                |
| Congestive heart failure         | ICD-8: 427.09, 427.10, 427.11, 427.19, 428.99, 782.49, ICD-10: I11.0, I13.0, I13.2, I50                                                  |
| Peripheral vascular disease      | ICD-8: 440, 441, 442, 443, 444, 445; ICD-10: I70, I71, I72, I73, I74, I77                                                                |
| Hemiplegia                       | ICD-8: 344; ICD-10: G81, G82                                                                                                             |
| Diabetes                         | ICD-8: 249.00, 249.06, 249.07, 249.09, 250.00, 250.06, 250.07, 250.09; ICD-10: E10.0, E10.1, E10.9, E11.0, E11.1, E11.9; ATC: A10A, A10B |
| Diabetes with end-organ damage   | ICD-8: 249.01-249.05, 249.08, 250.01-250.05, 250.08; ICD-10: E10.2-E10.8, E11.2-E11.8                                                    |
| Chronic pulmonary disease        | ICD-8: 490-493, 515-518; ICD-10: J40-J47, J60-J67, J68.4, J70.1, J70.3, J84.1, J92.0, J96.1, J98.2, J98.3; ATC: R03                      |
| Any tumor                        | ICD-8: 140-194; ICD-10: C00-C75                                                                                                          |
| Leukemia                         | ICD-8: 204-207; ICD-10: C91-C95                                                                                                          |
| Lymphoma                         | ICD-8: 200-203, 275.59; ICD-10: C81-C85, C88, C90, C96                                                                                   |
| Metastatic solid tumor           | ICD-8: 195-199; ICD-10: C76-C80                                                                                                          |
| Connective tissue disease        | ICD-8: 712, 716, 734, 446, 135.99; ICD-10: M05, M06, M08, M09, M30-M36, D86                                                              |
| Ulcer disease                    | ICD-8: 530.91, 530.98, 531-534; ICD-10: K22.1, K25-K28                                                                                   |
| Moderate to severe renal disease | ICD-8: 403, 404, 580-583, 584, 590.09, 593.19, 753.10-753.19, 792; ICD-10: I12, I13, N00-N05, N07, N11, N14, N17-N19, Q61                |
| Mild liver disease               | ICD-8: 571, 573.01, 573.04; ICD-10: B18, K70.0-K70.3, K70.9, K71, K73, K74, K76.0                                                        |
| Moderate to severe liver disease | ICD-8: 070.00, 070.02, 070.04, 070.06, 070.08, 573.00, 456.00-456.09; ICD-10: B15.0, B16.0, B16.2, B19.0, K70.4, K72, K76.6, I85         |

|                                     |                                                                                                 |
|-------------------------------------|-------------------------------------------------------------------------------------------------|
| Alcoholism-related disease          | ICD-8: 291, 303, 979, 980, 577.10; ICD-10: F.10, K29.2, K.86.0, Z72.1, R78.0, T51; ATC: N07BB01 |
| Dementia                            | ICD-8: 290.09-290.19, 293.09; ICD-10: F00-F03, F05.1, G30                                       |
| AIDS                                | ICD-8: 079.83; ICD-10: B21-B24                                                                  |
| <b>Medication use</b>               | <b>ATC codes (any previous use unless specified)</b>                                            |
| Drugs for cardiovascular disease    |                                                                                                 |
| Nitrates                            | C01DA (if $\geq 2$ prescriptions are registered).                                               |
| Diuretics                           | C03                                                                                             |
| Beta-blockers                       | C07                                                                                             |
| Calcium-channel antagonists         | C08                                                                                             |
| ACE inhibitors                      | C09 (C02 before 1 January 1996)                                                                 |
| Aspirin                             | B01AC06, N02BA01 (previous 125 days)                                                            |
| Antidiabetics                       | A10A, A10B                                                                                      |
| Inhaled drugs for pulmonary disease | R03                                                                                             |
| Disulfiram                          | N07BB01                                                                                         |
| Systemic antibiotics                | J01 (past 4 weeks)                                                                              |

**Supplement, Table 3.** Bacteremia patients' risk for sick leave, permanent disability pension, and mortality by focus of infection compared to blood culture negative controls.

|                                 | Respiratory tract infection<br>(N=164) | Urinary tract infection<br>(N=93) | Miscellaneous<br>(N=144) | Unknown or multiple<br>(N=49) |
|---------------------------------|----------------------------------------|-----------------------------------|--------------------------|-------------------------------|
| Sick leave, $\geq 4$ weeks      |                                        |                                   |                          |                               |
| Risk, n (% of N)                | 66 (40.2)                              | 26 (28.0)                         | 72 (50.0)                | 17 (34.7)                     |
| Adj. RD % (95% CI) <sup>a</sup> | 13.6 (6.2-21.2)                        | 2.1 (-7.0-11.2)                   | 24.1 (15.9-32.2)         | 7.9 (-5.3-21.0)               |
| Adj. RR (95% CI) <sup>a</sup>   | 1.51 (1.26-1.83)                       | 1.05 (0.76-1.46)                  | 1.87 (1.58-2.21)         | 1.32 (0.90-1.92)              |
| Sick leave, $\geq 52$ weeks     |                                        |                                   |                          |                               |
| Risk, n (% of N)                | 7 (4.3)                                | 1 (1.1)                           | 16 (11.1)                | 2 (7.1)                       |
| Adj. RD % (95% CI) <sup>a</sup> | 1.1 (-1.8-4.1)                         | -2.0 (-2.4--1.6)                  | 8.3 (3.1-13.4)           | 1.2 (-4.4-6.7)                |
| Adj. RR (95% CI) <sup>a</sup>   | 1.73 (0.90-3.33)                       | 4.65 (2.62-8.24)                  | 1.33 (0.44-4.07)         | 2.49 (0.36-17.29)             |
| Disability pension, 1-year      |                                        |                                   |                          |                               |
| Risk, n (% of N)                | 6 (3.7)                                | 2 (2.2)                           | 2 (1.4)                  | 2 (4.1)                       |
| Adj. RD % (95% CI) <sup>a</sup> | 0.7 (-2.2-3.5)                         | -1.2 (-4.2-1.8)                   | -1.6 (-3.5-3.4)          | -0.2 (-5.6-5.2)               |
| Adj. RR (95% CI) <sup>a</sup>   | 1.40 (0.52-3.77)                       | 0.52 (0.11-2.52)                  | 0.63 (0.15-2.70)         | 1.18 (0.29-4.85)              |
| Mortality, 30-day               |                                        |                                   |                          |                               |
| Risk, n (% of N)                | 3 (1.8)                                | 0 (0)                             | 8 (5.6)                  | 7 (14.3)                      |
| Adj. RD % (95% CI) <sup>a</sup> | 0.1 (-2.0-2.2)                         | -1.9 (-2.3--1.4)                  | 3.8 (0.1-7.5)            | 12.4 (2.6-22.2)               |
| Adj. RR (95% CI) <sup>a</sup>   | 0.47 (0.09-2.35)                       | -                                 | 3.39 (1.55-7.42)         | 10.14 (3.82-26.89)            |
| Mortality, 1-year               |                                        |                                   |                          |                               |
| Risk, n (% of N)                | 8 (4.9)                                | 2 (2.2)                           | 15 (10.4)                | 11 (22.5)                     |
| Adj. RD % (95% CI) <sup>a</sup> | -0.1 (-3.2-3.0)                        | -2.6 (-5.4-3.2)                   | 5.8 (0.9-10.7)           | 16.0 (4.6-27.5)               |
| Adj. RR (95% CI) <sup>a</sup>   | 1.26 (0.65-2.44)                       | 0.68 (0.17-2.83)                  | 2.46 (1.53-3.97)         | 3.66 (1.76-7.64)              |

Abbreviations: CAB, community-acquired bacteraemia. Adj., adjusted. <sup>a</sup>Risk difference and relative risk pertains to CAB patients versus blood culture negative controls (absolute risk estimates for controls can be found in main manuscript, Table 2). Risk difference and relative risk computed by log-binomial regression (sick leave analyses) and regression analyses based on pseudo-observations (disability pension and mortality analyses). Estimates are adjusted for age, gender, Charlson comorbidity score, and alcoholism-related disease (due to few events, 30 day mortality estimates are adjusted for age and gender only).

**Supplement, Table 4.** Risk for sick leave, disability pension, and mortality by age, gender, and employment status for community-acquired bacteraemia patients and blood culture negative controls.

|                              | Age group, years    |                     |                     | Gender              |                     | Employment status,<br>4 weeks before blood culture draw |                         |                                  |
|------------------------------|---------------------|---------------------|---------------------|---------------------|---------------------|---------------------------------------------------------|-------------------------|----------------------------------|
|                              | 20-34               | 35-49               | 50-58               | Female              | Male                | Employed <sup>a</sup>                                   | Unemployed <sup>b</sup> | Sick leave <sup>c</sup>          |
| Sick leave $\geq$ 4 weeks    |                     |                     |                     |                     |                     |                                                         |                         |                                  |
| Risk, CAB pts.               | 28/85<br>(32.9)     | 67/178<br>(37.6)    | 86/187<br>(46.0)    | 79/224<br>(35.3)    | 102/226<br>(45.1)   | 98/281<br>(34.9)                                        | 28/107<br>(26.2)        | 55/62<br>(88.7)                  |
| Risk, Controls               | 335/2338<br>(14.3)  | 721/2676<br>(26.9)  | 602/1922<br>(31.3)  | 707/3100<br>(22.8)  | 951/3836<br>(24.8)  | 843/4624<br>(18.2)                                      | 200/1384<br>(14.5)      | 615/928<br>(66.3)                |
| Adj. RR<br>(CI) <sup>d</sup> | 2.29<br>(1.68-3.13) | 1.39<br>(1.14-1.70) | 1.47<br>(1.24-1.74) | 1.33<br>(1.11-1.61) | 1.66<br>(1.42-1.93) | 1.71<br>(1.44-2.03)                                     | 1.81<br>(1.37-2.40)     | 1.23<br>(1.12-1.36)              |
| Sick leave $\geq$ 52 weeks   |                     |                     |                     |                     |                     |                                                         |                         |                                  |
| Risk, CAB pts.               | 6/85<br>(7.1)       | 5/178<br>(2.8)      | 15/187<br>(8.0)     | 11/224<br>(4.9)     | 15/226<br>(6.6)     | 11/281<br>(3.9)                                         | 6/107<br>(5.6)          | 9/62<br>(14.5)                   |
| Risk, Controls               | 29/2338<br>(1.2)    | 80/2676<br>(3.0)    | 72/1922<br>(3.8)    | 77/3100<br>(2.5)    | 104/3836<br>(2.7)   | 78/4624<br>(1.7)                                        | 29/1384<br>(2.1)        | 74/928<br>(8.0)                  |
| Adj. RR<br>(CI) <sup>d</sup> | 5.69<br>(2.43-3.34) | 0.94<br>(0.38-2.28) | 2.16<br>(1.27-3.70) | 1.76<br>(0.95-3.27) | 2.17<br>(1.28-2.67) | 1.97<br>(1.06-3.68)                                     | 2.33<br>(0.99-5.49)     | 1.74<br>(0.91-3.32)              |
| 1-year disability pension    |                     |                     |                     |                     |                     |                                                         |                         |                                  |
| Risk, CAB pts.               | 0/85<br>(0)         | 5/178<br>(2.8)      | 7/187<br>(3.7)      | 4/224<br>(1.8)      | 8/226<br>(3.5)      | 6/281<br>(2.1)                                          | 5/107<br>(4.7)          | 1/62<br>(1.6)                    |
| Risk, Controls               | 20/2338<br>(0.9)    | 69/2676<br>(2.6)    | 94/1922<br>(4.9)    | 81/3100<br>(2.6)    | 102/3836<br>(2.7)   | 69/4624<br>(1.5)                                        | 102/1384<br>(7.4)       | 12/928<br>(1.3)                  |
| Adj. RR<br>(CI) <sup>d</sup> | -                   | 0.85<br>(0.22-3.34) | 0.97<br>(0.42-2.23) | 0.44<br>(0.13-1.51) | 1.45<br>(0.65-3.21) | 1.52<br>(0.52-4.35)                                     | 0.54<br>(0.17-1.74)     | 1.25 <sup>e</sup><br>(0.16-9.45) |
| 30-day mortality             |                     |                     |                     |                     |                     |                                                         |                         |                                  |
| Risk, CAB pts.               | 1/85<br>(1.2)       | 7/178<br>(3.9)      | 10/187<br>(5.4)     | 8/224<br>(3.6)      | 10/226<br>(4.4)     | 10/281<br>(3.6)                                         | 7/107<br>(6.5)          | 1/62<br>(1.6)                    |
| Risk, Controls               | 9/2338              | 36/2676             | 54/1922             | 44/3100             | 55/3836             | 55/4624                                                 | 30/1384                 | 14/928                           |

|                              |                                  |                     |                     |                     |                     |                     |                     |                                  |
|------------------------------|----------------------------------|---------------------|---------------------|---------------------|---------------------|---------------------|---------------------|----------------------------------|
|                              | (0.4)                            | (1.4)               | (2.8)               | (1.4)               | (1.4)               | (1.2)               | (2.2)               | (1.5)                            |
| Adj. RR<br>(CI) <sup>d</sup> | 3.01 <sup>e</sup><br>(0.39-23.9) | 2.36<br>(0.82-6.81) | 1.87<br>(0.88-4.03) | 1.82<br>(0.61-5.40) | 2.53<br>(1.00-6.43) | 1.95<br>(0.89-4.28) | 2.63<br>(1.09-6.36) | 1.07 <sup>e</sup><br>(0.14-8.00) |
| 1-year mortality             |                                  |                     |                     |                     |                     |                     |                     |                                  |
| Risk, CAB pts.               | 2/85<br>(2.4)                    | 11/178<br>(6.2)     | 23/187<br>(12.3)    | 16/224<br>(7.1)     | 20/226<br>(8.8)     | 19/281<br>(6.8)     | 12/107<br>(11.2)    | 5/62<br>(8.1)                    |
| Risk, Controls               | 25/2338<br>(1.1)                 | 100/2676<br>(3.7)   | 146/1922<br>(7.6)   | 99/3100<br>(3.2)    | 172/3836<br>(4.5)   | 139/4624<br>(3.0)   | 76/1384<br>(5.5)    | 56/928<br>(6.0)                  |
| Adj. RR<br>(CI) <sup>d</sup> | 2.19 <sup>e</sup><br>(0.53-9.1)  | 1.66<br>(0.86-3.20) | 1.59<br>(1.03-2.46) | 1.52<br>(0.93-2.49) | 1.73<br>(0.99-3.02) | 1.81<br>(1.06-3.08) | 1.59<br>(0.86-2.93) | 1.12<br>(0.42-3.00)              |

Abbreviations: Adj., adjusted. RR, relative risk. CI, confidence interval. <sup>a</sup>Subjects who were registered as employed and actively working during all 4 weeks before admission. <sup>b</sup>Subjects who spent all 4 weeks as unemployed (84.7%) and subjects who were employed/unemployed (15.3%). <sup>c</sup>Subjects who were on sick leave for a maximum of 3 weeks in the previous 4 weeks, and otherwise employed or unemployed. Absolute risk estimates “Risk” are n/N (%). <sup>d</sup>Relative risk estimates with 95% confidence intervals pertain to CAB patients versus blood culture negative controls, and are adjusted for age, gender, and Charlson comorbidity score. <sup>e</sup>Unadjusted estimates presented due to few events.

**Supplement, Figure 1.** Flow chart of hospitalised medical study subjects with first-time blood cultures, North Denmark, 1996-2010.

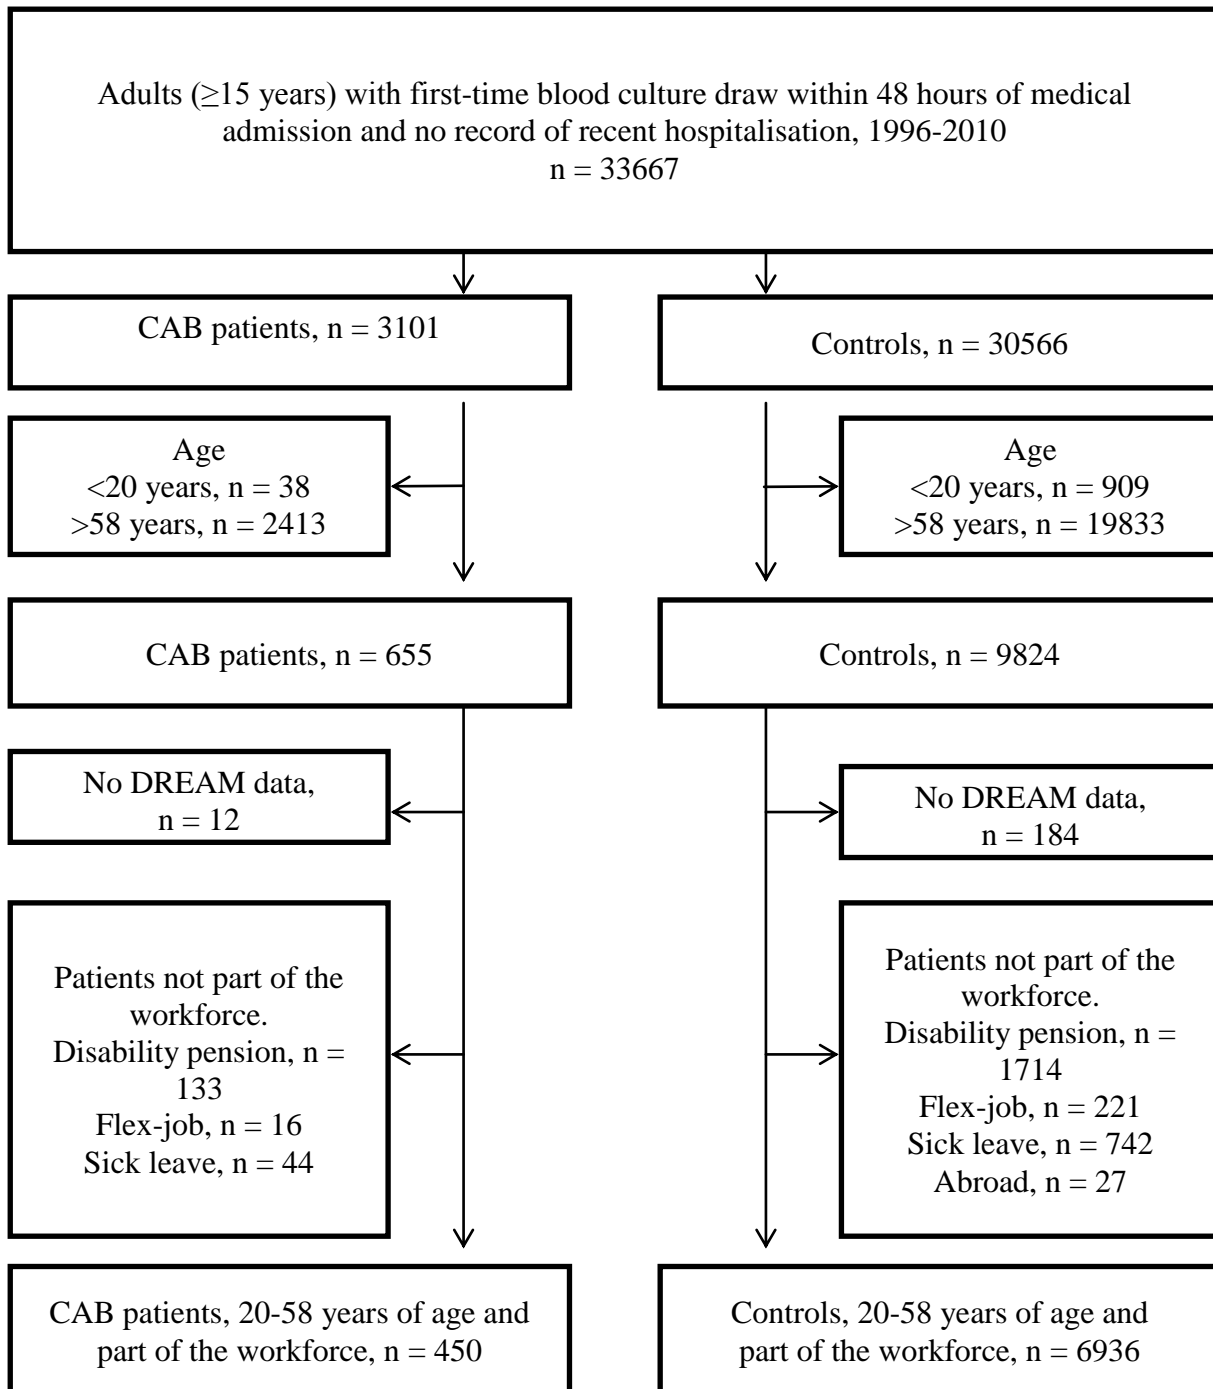

Abbreviations: CAB, community-acquired bacteraemia. Each CAB patient was matched to 10 population controls who had no recent hospital admission (previous 30 days) on year of birth, gender, and calendar-time (population controls had to be alive on the date of blood culture draw). Of these 4500 population controls some were excluded because of previous blood culture draw (n=132), age of 59 years (n=35), no DREAM data (n=99), or for not being part of the workforce in the previous four weeks (disability pension [n=336], long-term sick leave [88], abroad [55]) which left 3765 population controls for analysis.



**Supplement, Figure 2.** Cumulative mortality in workforce CAB patients, blood culture negative controls, and population controls, North Denmark, 1996-2011.

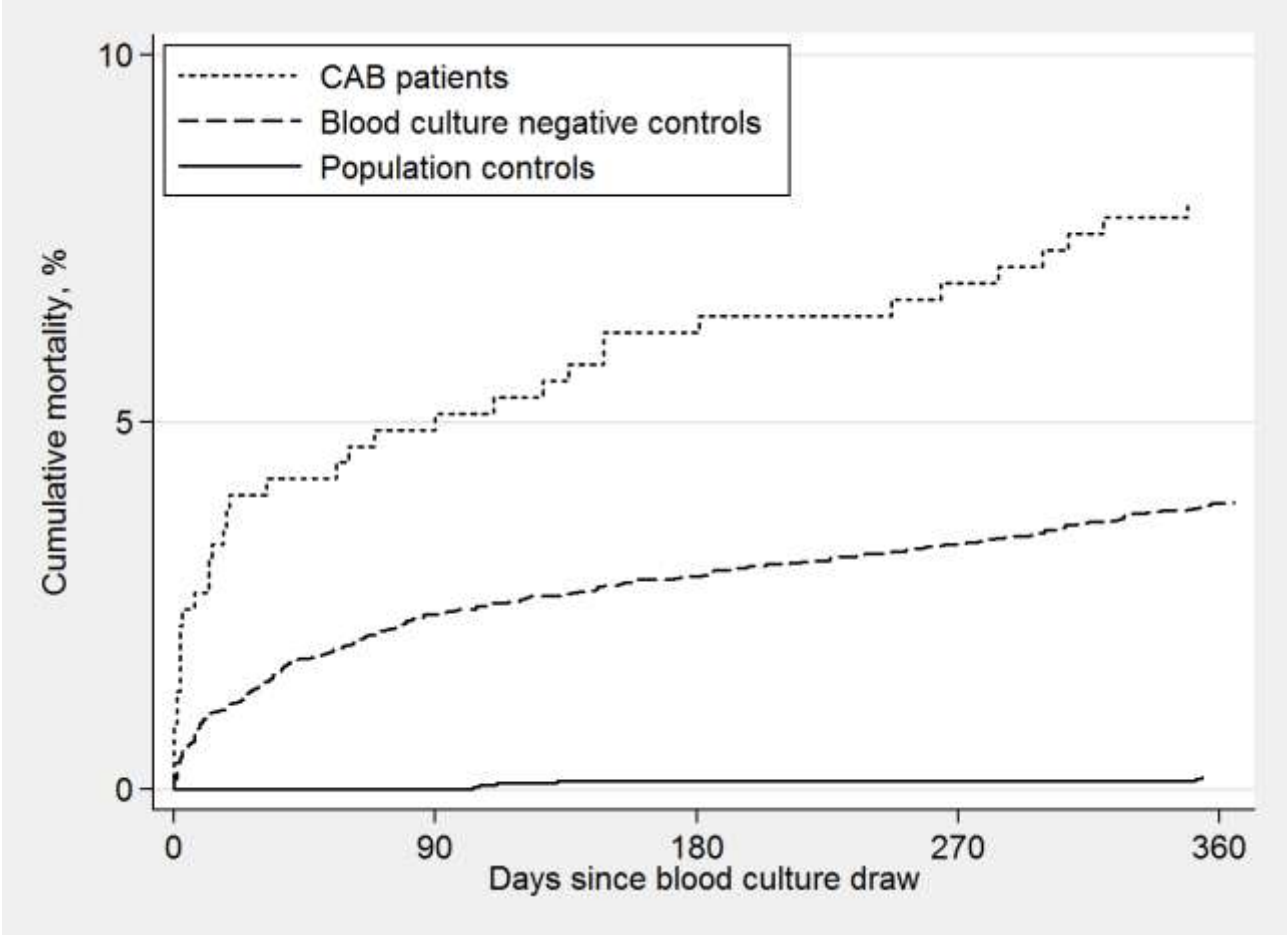

Supplement: bmjopen-2013-004208supp.pdf [file bmjopen-2013-004208supp.pdf]
